# Supplementary material for: SARS-CoV-2 Symptoms during the Omicron Surge Differ between Boosted and Vaccinated Non-Boosted Persons
Source: MDPI journal article supplement (doi:10.3390/vaccines12030327), 2024-03-19

**Supplemental Table S1. Characteristics of individuals and symptoms reported according to vaccination status with boosted defined as booster receipt more than 14 days before infection.**

|                                                             | Not Boosted  | Boosted      | p value |
|-------------------------------------------------------------|--------------|--------------|---------|
|                                                             | N= 120       | N= 273       |         |
| <b>Gender = Female, No. (%)</b>                             | 72 (60.0)    | 155 (56.8)   | 0.581   |
| <b>Age in years, Mean (SD)*</b>                             | 31.2 (10.4)  | 31.5 (12.3)  | 0.816   |
| <b>Student versus Employee Status, No (%)</b>               |              |              | 0.143   |
| Student                                                     | 80 (66.7)    | 203 (74.4)   |         |
| Employee                                                    | 40 (33.3)    | 70 (25.6)    |         |
| <b>Days Since Last Vaccine Until Infection, Mean (SD)</b>   | 221.2 (97.1) | 128.8 (60.9) | <0.001  |
| <b>Primary Symptoms Present, No. (%)</b>                    |              |              |         |
| Cough                                                       | 96 (80.0)    | 231 (84.6)   | 0.305   |
| Fever- present or temperature $\geq 100^{\circ}\text{F}$    | 63 (52.5)    | 148 (54.2)   | 0.826   |
| Nasal congestion                                            | 53 (44.2)    | 160 (58.6)   | 0.009   |
| Sore throat                                                 | 52 (43.3)    | 130 (47.6)   | 0.444   |
| Headache                                                    | 41 (34.2)    | 69 (25.3)    | 0.087   |
| Body/ muscle aches                                          | 38 (31.7)    | 60 (22.0)    | 0.044   |
| Fatigue                                                     | 27 (22.5)    | 73 (26.7)    | 0.451   |
| Shortness of breath                                         | 23 (19.2)    | 32 (11.7)    | 0.058   |
| Gastrointestinal symptoms                                   | 11 (9.2)     | 17 (6.2)     | 0.295   |
| Change in taste or smell                                    | 7 (5.8)      | 6 (2.2)      | 0.073   |
| Nasal congestion and/or sore throat                         | 78 (65.0)    | 209 (76.6)   | 0.019   |
| <b>Number of Primary Symptoms Reported, Mean (SD)</b>       | 3.4 (1.8)    | 3.4 (1.5)    | 0.851   |
| Other Symptoms, No (%)                                      |              |              | 0.468   |
| 0                                                           | 106 (88.3)   | 234 (85.7)   |         |
| 1                                                           | 11 (9.2)     | 35 (12.8)    |         |
| 2                                                           | 3 (2.5)      | 4 (1.5)      |         |
| <b>Number of Primary Plus Other Symptoms, Mean (SD)</b>     | 3.6 (2.0)    | 3.5 (1.6)    | 0.927   |
| <b>Days Symptoms Present, Mean (SD)</b>                     | 7.0 (3.1)    | 6.4 (2.9)    | 0.044   |
| Cases before January 1, required isolation = 10 days n= 76  | 7.4 (3.1)    | 6.1 (2.2)    | 0.098   |
| Cases on/after January 1, required isolation = 5 days n=317 | 6.6 (3.1)    | 6.3 (2.8)    | 0.574   |
|                                                             |              |              |         |
| <b>Days Isolated, Mean (SD)</b>                             |              |              |         |
| Cases before January 1, required isolation = 10 days n= 76  | 11.0 (1.6)   | 11.0 (1.3)   | 1.000   |
| Cases on/after January 1, required isolation = 5 days n=317 | 10.2 (2.9)   | 8.4 (2.9)    | < 0.001 |

\*SD= Standard deviation

Supplemental Figure S1. The correlation between the date of infection represented as calendar week on the x-axis and the weeks between receipt of booster vaccination and date of SARS-CoV-2 infection represented on the y-axis.

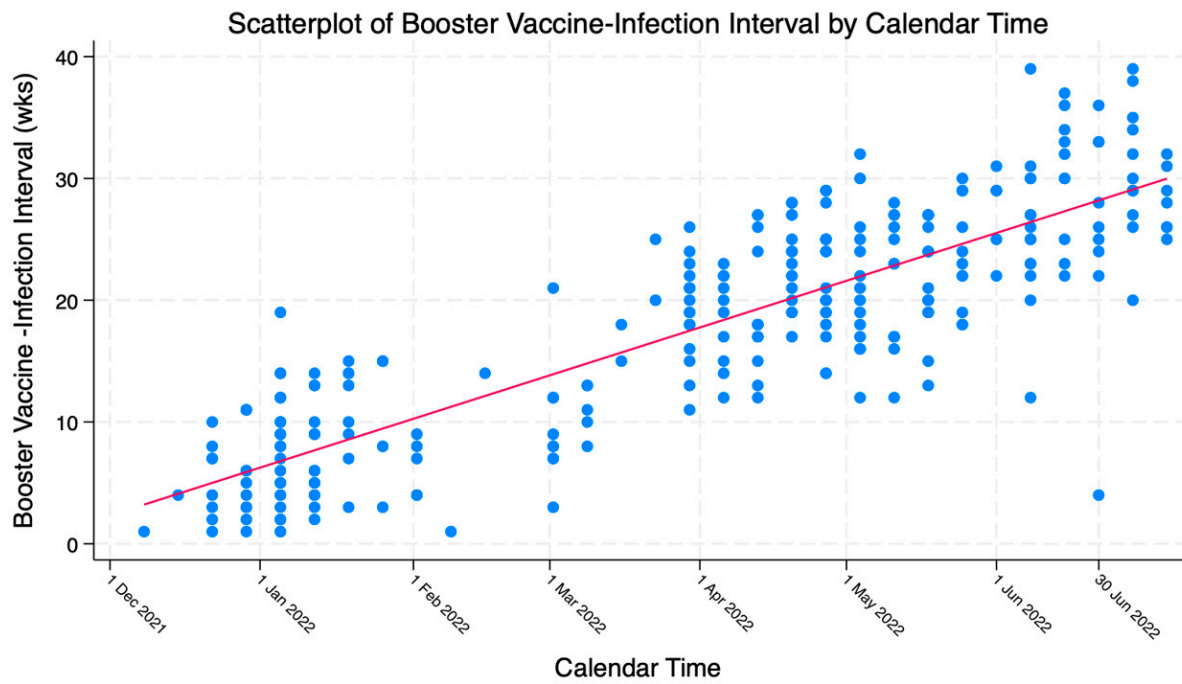

Supplement: s1 [file s1]
